# Supplementary material
Source: publisher figshare collection journal article supplement (https://gsajournals.figshare.com/articles/dataset/_/18430457)
Supplement: Supplementary file 3 [file 1]

| Gene                              | Transcript               | Exon | Target 1 (5'-3')                              | Target 2 (5'-3')            | Flanking Forward (5'-3')   | Flanking Reverse (5'-3')   |
|-----------------------------------|--------------------------|------|-----------------------------------------------|-----------------------------|----------------------------|----------------------------|
| <i>gabra1</i><br>( $\alpha 1$ )   | ENSDART00<br>000166148.2 | 5    | GCCGTTGTGGAA<br>GAACGTGT                      | GAGGTTGTTGAGACG<br>GAGCA    | GAATTGTCTGTGACA<br>AGGCTCA | ATCAAATCCAATTCT<br>GTCCCAG |
| <i>gabra2a</i><br>( $\alpha 2a$ ) | ENSDART00<br>000130007.3 | 6    | GCTCAACAGAGA<br>GTCAGTTC                      | AGAGACTTGAGATAA<br>GATGA    | TCATGTTTCTCTCCT<br>GCTGTGT | AAAGGATGTTTTATA<br>GCCAGCG |
| <i>gabra2b</i><br>( $\alpha 2b$ ) | ENSDART00<br>000192863.1 | 3    | GTAGATGTCGGT<br>CTTCACTG                      | GTCTGAAACAGGGCC<br>GAAAC    | TCCTATTGAGGGAT<br>GAGCAAAT | TCTTTTTGTCTGGGT<br>AGGTGGT |
| <i>gabra3</i><br>( $\alpha 3$ )   | ENSDARG00<br>000090883.5 | 3    | GGTATGGCTTCA<br>GCGCTTGG                      | GTTGTGGAAGAAGGT<br>ATCCG    | GGACGAGAGGTTGA<br>AGTTTGAC | TTGCATGTTTTGTAT<br>CTCGCTT |
| <i>gabra4</i><br>( $\alpha 4$ )   | ENSDART00<br>000014454.8 | 2    | TGTCGTATCCAT<br>CCAGGAGT                      | TGGCACTTACCCCCA<br>AATCC    | GCTTCAGTTTGCTCT<br>GTGTTGT | CACTTAGTAAACAG<br>CGTGCGAC |
| <i>gabra5</i><br>( $\alpha 5$ )   | ENSDARG00<br>000070730   | 4    | TCCCTGTAGTTG<br>ACTGGGAG                      | ATGATAACAGACTTC<br>GACCT    | AACGCCTAATGGAC<br>GAGAGATA | ACTGAAGCACGATC<br>TTGACAAA |
| <i>gabra6a</i><br>( $\alpha 6a$ ) | ENSDART00<br>000054982.7 | 2    | CTTCATTTCTCTC<br>TGCTTAGCG                    | AGACTGCAAAGGTTA<br>ACAACAGG | AGGGCTATGACAAT<br>CGACTA   | GATTCTAGACGGAC<br>TTCTTG   |
| <i>gabra6b</i><br>( $\alpha 6b$ ) | ENSDARG00<br>000058736   | 4    | GGTCAGCAAGAT<br>CTGGACGC                      | AGATGACCGGCTGAA<br>ATTTG    | TACACGATGGATGT<br>GTTTTTCC | GTCCATTTTTGACTT<br>GGAGAGC |
| <i>tyr</i>                        | ENSDARG00<br>000039077   | 1    | CCCCAGAAGTCC<br>TCCAGTCC (Jao<br>et al. 2013) | N/A                         | CAGCTCTTCAGCTC<br>GTCTCTC  | AGCGATGGCCTTTA<br>GTGTTTTA |
