# Supplementary material
Source: publisher figshare collection journal article supplement (https://gsajournals.figshare.com/articles/dataset/_/18430457)
Supplement: Supplementary file 4 [file 1]

| Injected guide RNA                     | Number of Peaks of 1k RFU | Inj:WT Ratio | Peak 1 | Peak 2 | Peak 3 | Peak 4 | Peak 5 | Peak 6 | Peak 7 | Peak 8 | Peak 9 | Peak 10+ |
|----------------------------------------|---------------------------|--------------|--------|--------|--------|--------|--------|--------|--------|--------|--------|----------|
| <i>gabra1_t1</i> ( $\alpha 1$ )        | 7                         | 7            | 2039   | 3890   | 1223   | 1558   | 6871   | 32767  | 3514   | 1242   |        |          |
| <i>gabra1</i> ( $\alpha 1$ ) control   | 1                         |              | 32767  |        |        |        |        |        |        |        |        |          |
| <i>gabra2a_t2</i> ( $\alpha 2a$ )      | 4                         | 2            | 3277   | 1707   | 4036   | 20864  |        |        |        |        |        |          |
| <i>gabra2a</i> ( $\alpha 2a$ ) control | 2                         |              | 2006   | 16152  |        |        |        |        |        |        |        |          |
| <i>gabra2b_t2</i> ( $\alpha 2b$ )      | 14                        | 14           | 1418   | 1015   | 5847   | 1265   | 5088   | 10040  | 1311   | 4449   | 1102   | 2717*    |
| <i>gabra2b</i> ( $\alpha 2b$ ) control | 1                         |              | 13557  |        |        |        |        |        |        |        |        |          |
| <i>gabra3_t1</i> ( $\alpha 3$ )        | 12                        | 12           | 2799   | 1294   | 4759   | 3648   | 2724   | 10138  | 4067   | 2040   | 1116   | 1150*    |
| <i>gabra3</i> ( $\alpha 3$ ) control   | 1                         |              | 32767  |        |        |        |        |        |        |        |        |          |
| <i>gabra4_t2</i> ( $\alpha 4$ )        | 6                         | 6            | 1070   | 1566   | 6361   | 4313   | 2762   | 1930   | 1573   | 17348  | 1211   |          |
